# Supplementary material for: Spatial Transcriptomics: Emerging Technologies in Tissue Gene Expression Profiling
Source: PubMed Central journal article supplement (PMC10603609; doi:10.1021/acs.analchem.3c02029), 2023-10-10
Supplement: ac3c02029_si_001.pdf [file ac3c02029_si_001.pdf]

# Supporting Information

## Spatial Transcriptomics: Emerging Technologies in Tissue Gene Expression Profiling

Agustín Robles-Remacho<sup>\*1,2,3</sup>, Rosario M. Sánchez-Martín<sup>\*1,2,3</sup>, Juan José Díaz-Mochón<sup>\*1,2,3</sup>

<sup>1</sup>GENYO. Centre for Genomics and Oncological Research: Pfizer / University of Granada / Andalusian Regional Government. PTS Granada. Avenida de la Ilustracion, 114. 18016 Granada, Spain.

<sup>2</sup>Department of Medicinal and Organic Chemistry, School of Pharmacy, University of Granada, Campus Cartuja s/n, 18071 Granada, Spain.

<sup>3</sup>Biosanitary Research Institute of Granada (ibs.GRANADA), University Hospital of Granada/University of Granada, Avenida del Conocimiento, s/n, 18016 Granada, Spain.

\*Corresponding authors: Agustín Robles-Remacho (agustin.robles@genyo.es), Rosario M. Sanchez-Martín (rosario.sanchez@genyo.es) and Juan José Díaz-Mochón (juanjose.diaz@genyo.es)

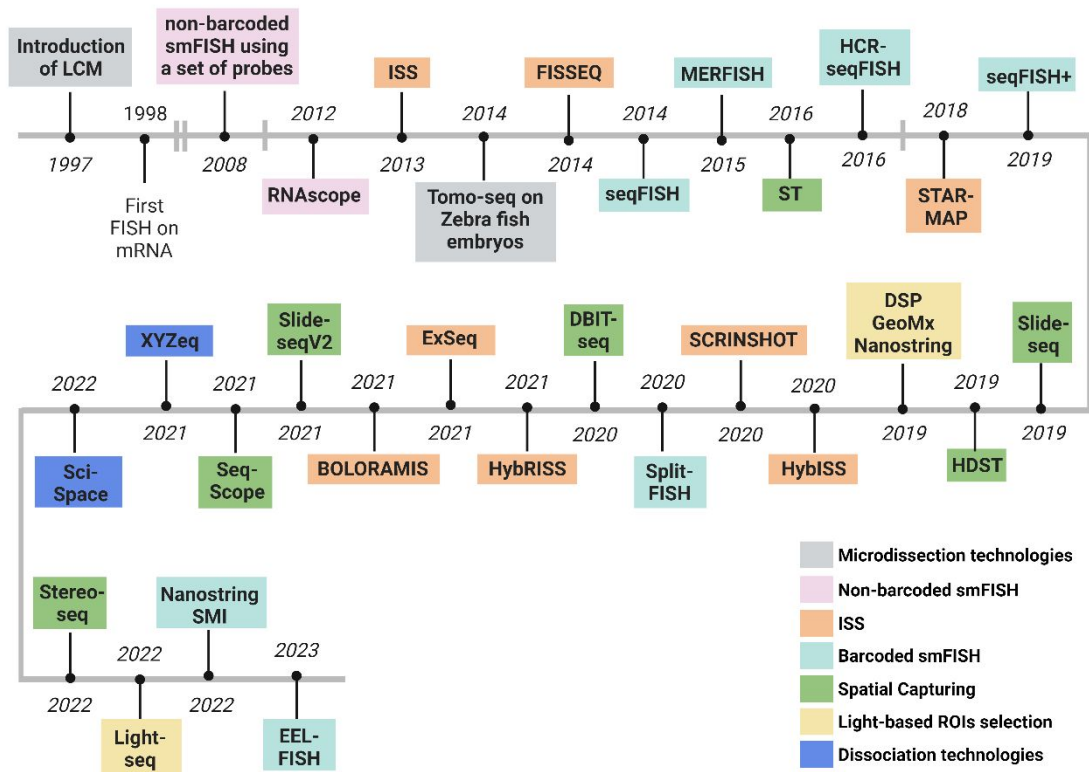

**Figure S1.** Spatial Transcriptomics Timeline. Scheme of Spatial Transcriptomics technologies classified by types and the date they were first published.

| Method                      | Efficiency                          | Number of gene transcripts | Size resolution | Barcoding Strategy ( <i>in situ</i> )  | Type of Tissue           | Commercialized    | Advantages                                                                                    | Limitations                                                                                   |
|-----------------------------|-------------------------------------|----------------------------|-----------------|----------------------------------------|--------------------------|-------------------|-----------------------------------------------------------------------------------------------|-----------------------------------------------------------------------------------------------|
| <b>ISS-Based methods</b>    |                                     |                            |                 |                                        |                          |                   |                                                                                               |                                                                                               |
| ISS                         | 5-30 %                              | 222                        | Single-cell     | SBL                                    | Fresh Frozen             | Yes, as Xenium    | -Robust detection<br>-High SBR                                                                | -Image crowding<br>-Moderate multiplexing capacity                                            |
| HyBISS                      | Similar to ISS                      | 120                        | Single-cell     | SBH                                    | Fresh Frozen             | No                | -Enhanced SBR compared to ISS                                                                 | -Lower number of transcript gene demonstrated than ISS                                        |
| HybRISS                     | Increased 5-fold compared to ISS    | 50                         | Single-cell     | SBH                                    | Fresh Frozen             | No                | -Enhanced efficiency<br>-Possibility to study more targets than mRNA species                  | -Lower number of transcript gene demonstrated than ISS                                        |
| SCRINSHOT                   | Improved efficiency compared to ISS | 29                         | Single-cell     | SBL                                    | Fresh Frozen             | No                | -Enhanced efficiency<br>-Possibility to study more targets than mRNA species                  | -Lower number of transcript gene demonstrated than ISS                                        |
| FISSEQ                      | (<0,0001%)                          | Transcriptome wide         | Single-cell     | SBL                                    | Fresh Frozen             | No                | -Possibility to conduct <i>de novo</i> analyses                                               | -Remarkable low efficiency                                                                    |
| ExSeq                       | 60 %                                | 297                        | Single-cell     | SBL/NGS                                | Fresh Frozen             | No                | -Enhanced efficiency than FISSEQ<br>-Possibility for <i>Ex Situ</i> Analyses                  | -Increased imaging time                                                                       |
| BOLORAMIS                   | 10 % - 35 %                         | 96                         | Single-cell     | SBL                                    | Fresh Frozen             | No                | -Possibility to study more targets than mRNA species                                          | -Lower number of transcript gene demonstrated than ISS                                        |
| STAR-MAP                    | Similar to scRNA-seq                | ~1000-2700                 | Single-cell     | SEDAL                                  | Fresh Frozen             | No                | -Possibility to study 3D sections (150 $\mu$ m thick)                                         | -3D sections limited to 28 genes                                                              |
| <b>smFISH-Based methods</b> |                                     |                            |                 |                                        |                          |                   |                                                                                               |                                                                                               |
| MERFISH                     | 80-95 %                             | ~10,000                    | Single-cell     | N-binary word code decodification      | Fresh Frozen<br>FFPE     | Yes, as MER-Scope | -High multiplexity capacity<br>-High efficiency<br>-Include Error Correction Scheme           | -Low SBR<br>-High number of probes                                                            |
| HCR-seqFISH                 | ~80 %                               | 249                        | Single-cell     | Color-codes associated to mRNA species | Fresh Frozen             | No                | -High efficiency<br>-Include Error Correction Scheme                                          | -Low SBR<br>-Need for specialized equipment<br>-Moderate multiplexing capacity                |
| SeqFISH+                    | 49 %                                | ~10,000                    | Single-cell     | Color-codes associated to mRNA species | Fresh Frozen             | No                | -High multiplexity capacity<br>-High efficiency<br>-Include Error Correction Scheme           | -High number of probes<br>-Need for specialized equipment<br>-Methodology difficult to handle |
| Split-FISH                  | 71 %                                | 317                        | Single-cell     | N-binary word code decodification      | Fresh Frozen             | No                | -Enhanced SBR ratios<br>-Include Error Correction Scheme                                      | -Moderate multiplexing capacity                                                               |
| SMI-Nanostring              | NA                                  | 980                        | Single-cell     | N-binary word code decodification      | Fresh Frozen and<br>FFPE | Yes               | -Automated system<br>-Possibility to protein co-detection<br>-Include Error Correction Scheme | -Moderate multiplexing capacity                                                               |
| EEL-FISH                    | ~13 %                               | ~2000                      | Single-cell     | N-binary word code decodification      | Fresh Frozen             | No                | -High SBR ratios<br>-Reduced optical crowding                                                 | -Lower efficiency compared to other smFISH methods                                            |

**Table S1.** Comparison of ISS and smFISH-based technologies.

| Method                                               | Efficiency                                                                                 | Number of mRNA species | -Spot size<br>-Spot-to-spot distance                                            | Covered area                        | Barcoding Strategy (ex situ) | Type of Tissue        | Commercialized | Advantages                                                                                                  | Limitations                                                                                        |
|------------------------------------------------------|--------------------------------------------------------------------------------------------|------------------------|---------------------------------------------------------------------------------|-------------------------------------|------------------------------|-----------------------|----------------|-------------------------------------------------------------------------------------------------------------|----------------------------------------------------------------------------------------------------|
| <b>Microdissection Technologies</b>                  |                                                                                            |                        |                                                                                 |                                     |                              |                       |                |                                                                                                             |                                                                                                    |
| LCM                                                  | NA                                                                                         | Transcriptome wide     | Single-cell resolution                                                          | NA                                  | NGS                          | Fresh Frozen and FFPE | Yes            | -Easy implementation (Microdissection microscope)<br>-Available for FFPE                                    | -Limited number of single cells analyzed per tissue                                                |
| Tomo-seq                                             | NA                                                                                         | Transcriptome wide     | Up to 8 $\mu\text{m}$                                                           | NA                                  | NGS                          | Fresh Frozen          | No             | -Easy implementation (Sections from a biological system)                                                    | -Resolution limited to the area sectioned (lack single-cell resolution)                            |
| <b>Spatial Capturing Technologies</b>                |                                                                                            |                        |                                                                                 |                                     |                              |                       |                |                                                                                                             |                                                                                                    |
| ST/Visium                                            | ~30,000 UMIs per 100 $\mu\text{m}^2$ area                                                  | Transcriptome wide     | -100 $\mu\text{m}$ / 55 $\mu\text{m}$<br>-200 $\mu\text{m}$ / 100 $\mu\text{m}$ | 42.25 $\text{mm}^2$                 | NGS                          | Fresh Frozen and FFPE | Yes            | -Most available commercial option<br>-Available for FFPE                                                    | -Lack single-cell resolution                                                                       |
| Slide-seqV2                                          | ~550 UMIs per 10 $\mu\text{m}^2$ area                                                      | Transcriptome wide     | -10 $\mu\text{m}$<br>-10 $\mu\text{m}$                                          | 7 $\text{mm}^2$                     | NGS                          | Fresh Frozen          | No             | -High spot size resolution                                                                                  | -Analyses require grouping areas                                                                   |
| HDST                                                 | ~10 UMIs per 2 $\mu\text{m}^2$ area                                                        | Transcriptome wide     | -2 $\mu\text{m}$<br>-2 $\mu\text{m}$                                            | 13.68 $\text{mm}^2$                 | NGS                          | Fresh Frozen          | No             | -High spot size resolution                                                                                  | -Low efficiency<br>-Analyses require grouping areas                                                |
| DBIT-Seq                                             | ~5000 UMIs per 10 $\mu\text{m}^2$ area                                                     | Transcriptome wide     | -10 $\mu\text{m}$ or 50 $\mu\text{m}$<br>-10 $\mu\text{m}$ or 50 $\mu\text{m}$  | 1 $\text{mm}^2$ or 25 $\text{mm}^2$ | NGS                          | Fresh Frozen and FFPE | No             | -Adapted as a microfluidic system                                                                           | -Uncovered spaces between squares<br>-Analyses require grouping areas                              |
| Seq-Scope                                            | 5-25 UMIs per HDMI cluster<br>~1000 UMIs per 10 $\mu\text{m}^2$ area                       | Transcriptome wide     | -Submicrometric HDMI cluster<br>-600 nm                                         | 0.2 $\text{mm}^2$                   | NGS                          | Fresh Frozen          | No             | -High spot size resolution<br>-Submicrometric HDMI clusters                                                 | -Reduced capturing area<br>-Analyses require grouping areas                                        |
| Stereo-seq                                           | 62 UMIs per DNB cluster (2 $\mu\text{m}^2$ area)<br>~1000 UMIs per 10 $\mu\text{m}^2$ area | Transcriptome wide     | -220 nm<br>-600 nm                                                              | 50 – 200 $\text{mm}^2$              | NGS                          | Fresh Frozen          | No             | -High spot size resolution<br>-Submicrometric DNB clusters<br>-High capture area (up to 200 $\text{mm}^2$ ) | -Analyses require grouping areas                                                                   |
| Pixel-seq                                            | ~1000 UMIs per 10 $\mu\text{m}^2$ area                                                     | Transcriptome wide     | ~1 $\mu\text{m}$<br>-Continuous spot-to-spot distance                           | 5-15 $\text{mm}^2$ areas            | NGS                          | Fresh Frozen          | No             | -High spot size resolution<br>-Developed to be scalable                                                     | -Analyses require grouping areas                                                                   |
| <b>Light-based ROI selection technologies</b>        |                                                                                            |                        |                                                                                 |                                     |                              |                       |                |                                                                                                             |                                                                                                    |
| GeoMx DSP-Nanostring                                 | ~1000 gene transcripts in 400 $\mu\text{m}$ diameter ROIs                                  | Transcriptome wide     | ROIs from 10-600 $\mu\text{m}$                                                  | NA                                  | NGS or nCounter              | Fresh Frozen and FFPE | Yes            | -Easy implementation (Automated system)<br>-Available for FFPE<br>-Possibility for protein codetection      | -For whole tissue transcriptomics analyses, laborious manual selection of a limited number of ROIs |
| Light-seq                                            | ~1,000–10,000 UMIs per 10 $\mu\text{m}^2$ area                                             | Transcriptome wide     | Minimum ROI: 2 $\mu\text{m}$                                                    | NA                                  | NGS                          | Fresh Frozen          | No             | -ROIs resolution up to 2 $\mu\text{m}$<br>-Option for sample reutilization                                  | -For whole tissue transcriptomics analyses, laborious manual selection of a limited number of ROIs |
| <b>Spatial Cell/Nuclei Dissociation Technologies</b> |                                                                                            |                        |                                                                                 |                                     |                              |                       |                |                                                                                                             |                                                                                                    |
| XYZeq                                                | ~1000 UMIs per 500 $\mu\text{m}$ diameter wells                                            | Transcriptome wide     | -500 $\mu\text{m}$ wells<br>-500 $\mu\text{m}$ distance                         | NA                                  | NGS                          | Fresh Frozen          | No             | Cells dissociated as barcoded spots                                                                         | Limited resolution to areas of 500 $\mu\text{m}$                                                   |
| Sci-space                                            | ~2000 UMIs estimated per cell                                                              | Transcriptome wide     | -73.2 $\mu\text{m}$<br>-222 $\mu\text{m}$                                       | NA                                  | NGS                          | Fresh Frozen          | No             | Nuclei dissociated as barcoded spots                                                                        | Limited to nuclear transcriptomics analyses                                                        |

**Table S2.** Comparison of microdissection, spatial capture, light-based ROIs selection, and dissociation-based technologies.
